# Supplementary material for: Visible-light initiated polymerization of dopamine in a neutral environment for surface coating and visual protein detection
Source: Royal Society of Chemistry journal article supplement (doi:10.1039/c8py01140k), 2018-01-01
Supplement: c8py01140k1.pdf [file c8py01140k1.pdf]

## Supporting information

### **Visible-light initiated polymerization of dopamine in a neutral environment for surface coating and visual protein detection**

Jinhu Wang,<sup>a</sup> Guolu Ma,<sup>b</sup> Wei Huang,<sup>a</sup> and Yi He<sup>\*a</sup>

<sup>a</sup> School of National Defence Science & Technology, Southwest University of Science and Technology, Mianyang, 621010, P. R. China.

<sup>b</sup> Ministry of Education Key Laboratory of Testing Technology for Manufacturing Process, Southwest University of Science and Technology, Mianyang, 621010, P. R. China.

\*Corresponding author: Dr. Yi He, Tel: +86-816-6089885, Fax: +86-816-6089889, Email: yhe2014@126.com.

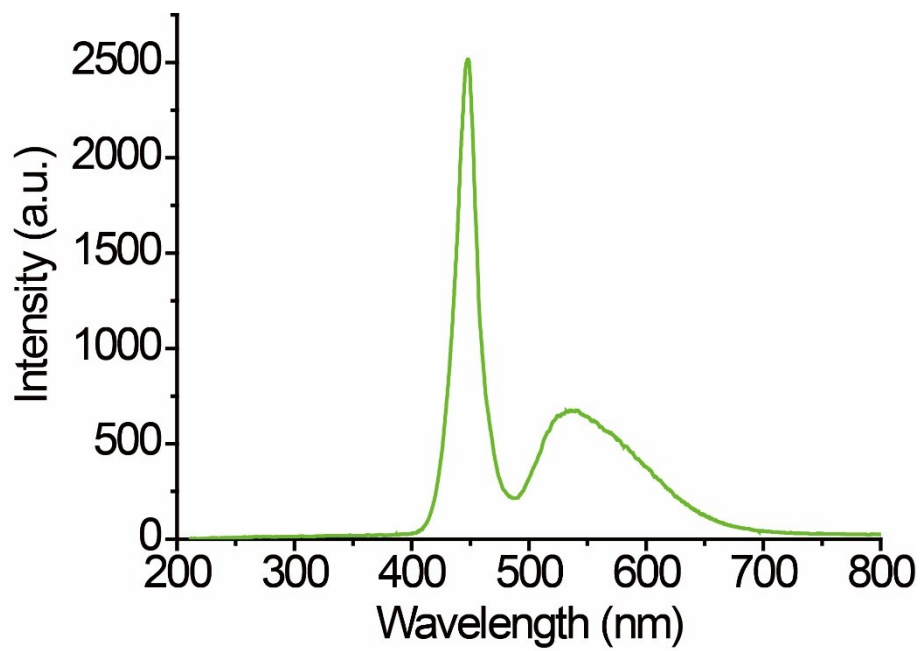

**Figure S1.** The emission spectrum of the white LED.

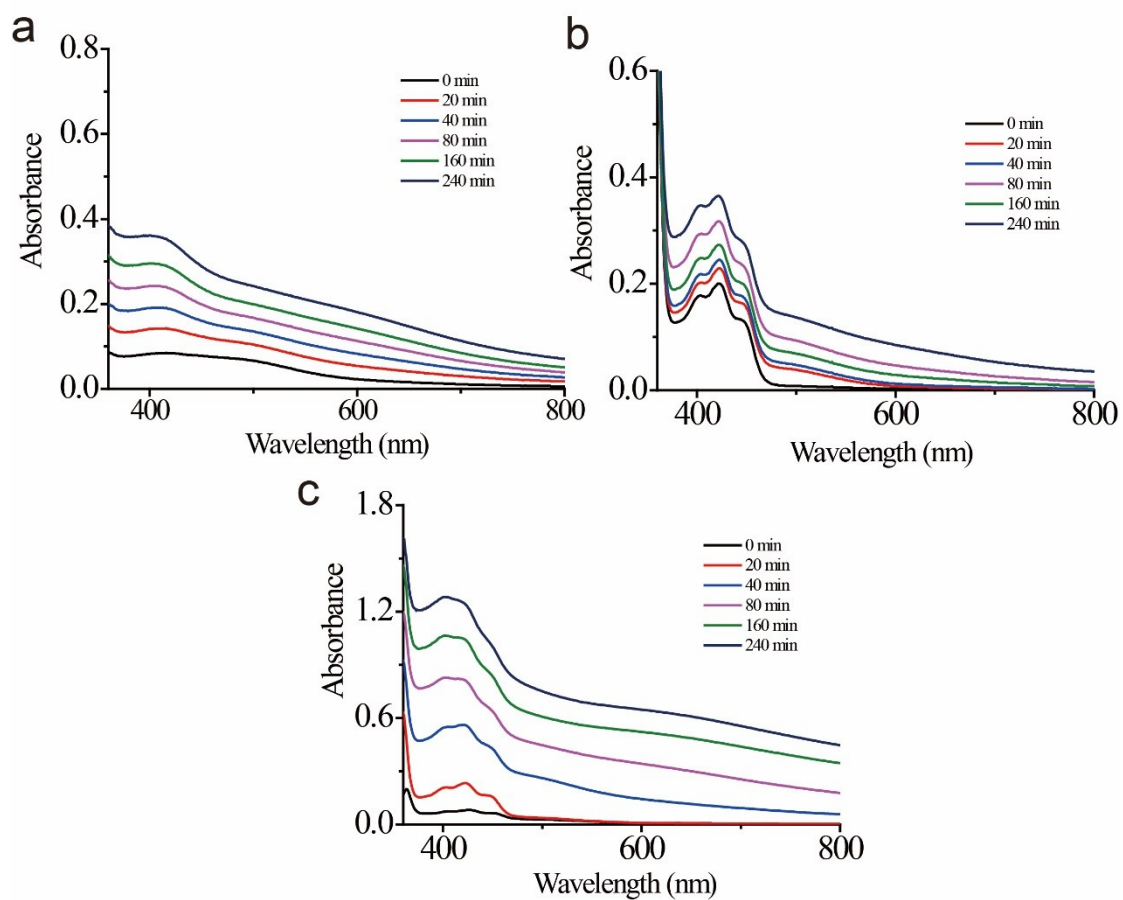

**Figure S2.** Time-dependent UV-vis absorption spectra for (a) dopamine solution and the mixture of dopamine and Acr<sup>+</sup>-Mes in the dark (b) and under white LED irradiation (c).

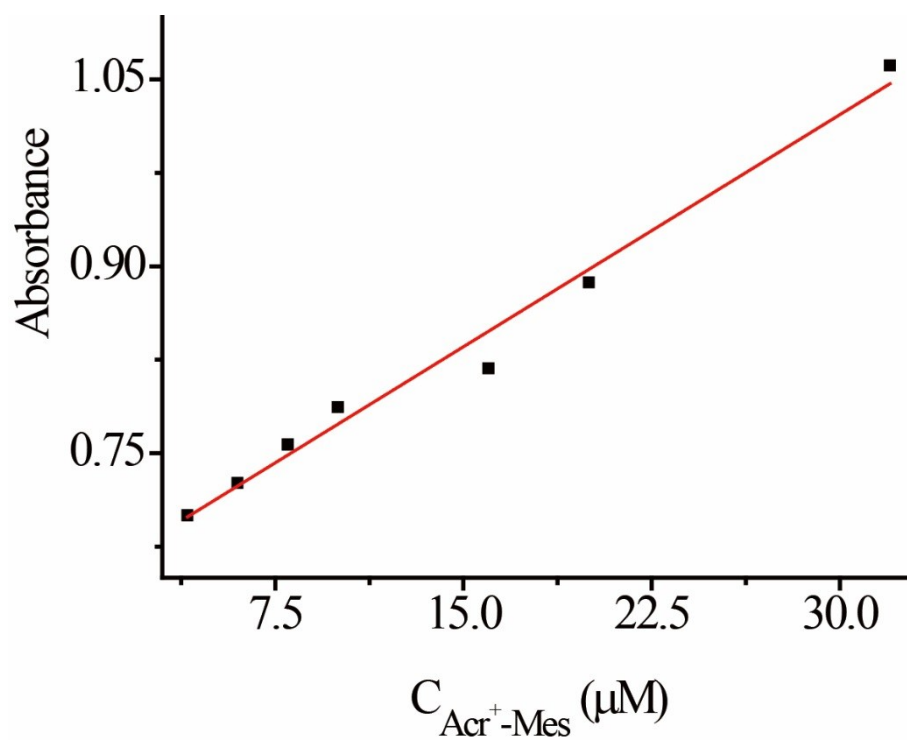

**Figure S3.** Effect of  $\text{Acr}^+-\text{Mes}$  concentration on oxidation of dopamine under white LED illumination.

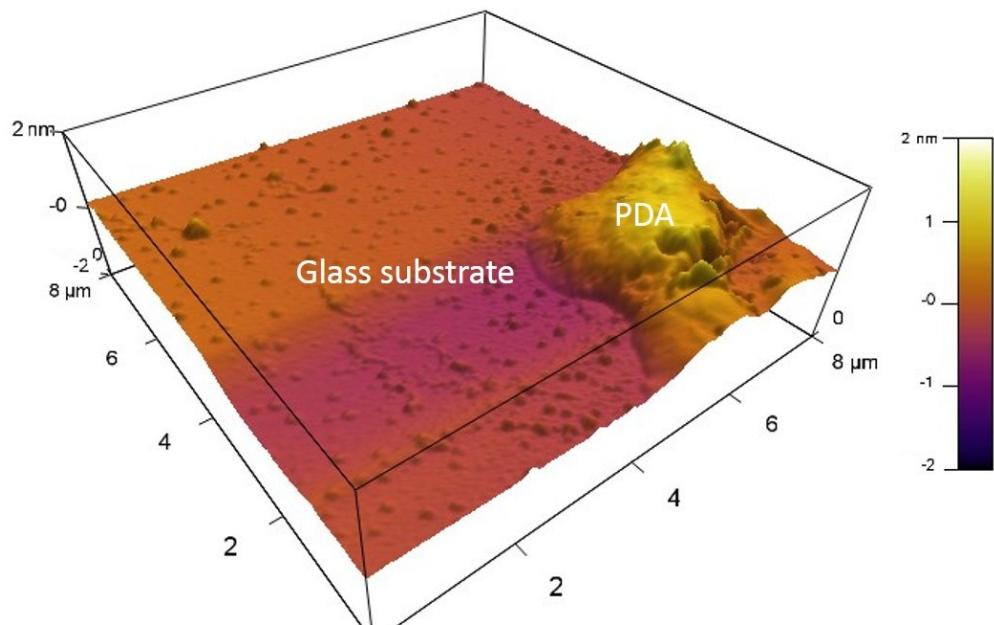

**Figure S4.** AFM image of the PDA-coated glass substrate under white LED illumination for 1 h.

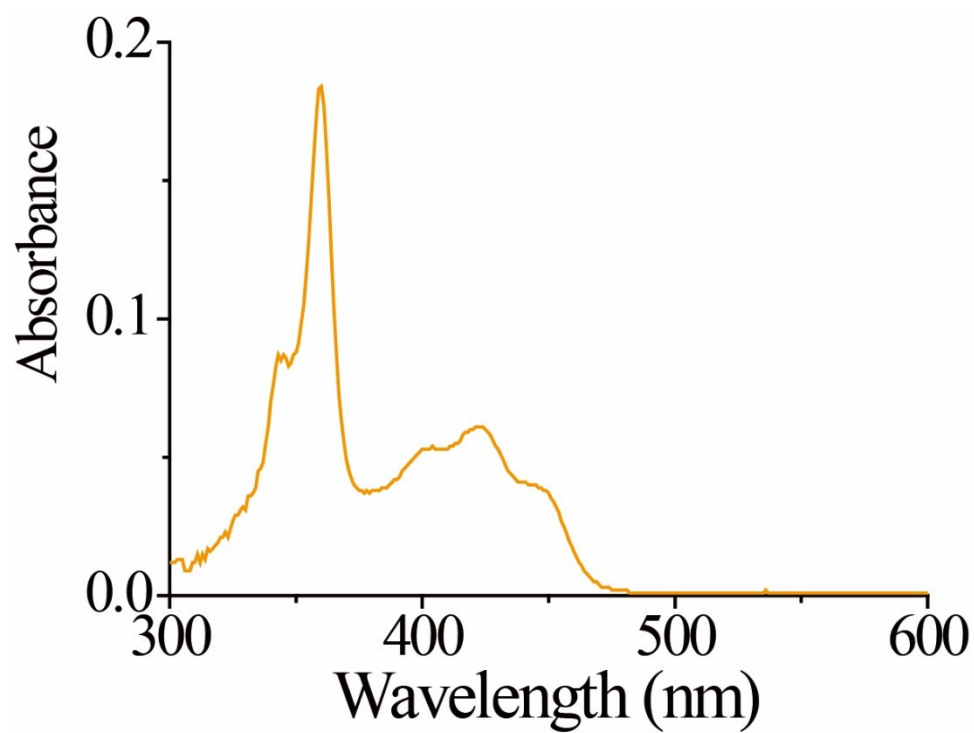

**Figure S5.** UV-vis absorption spectra of 10 μM Acr<sup>+</sup>-Mes solution.

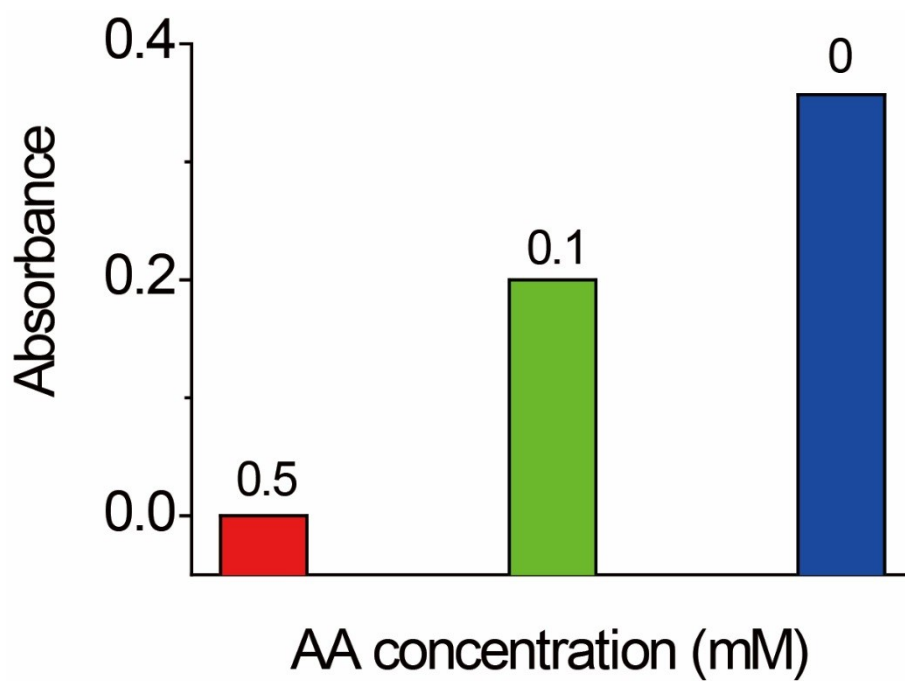

**Figure S6.** Effect of ascorbic acid (AA) concentration on oxidation of dopamine under white LED illumination.

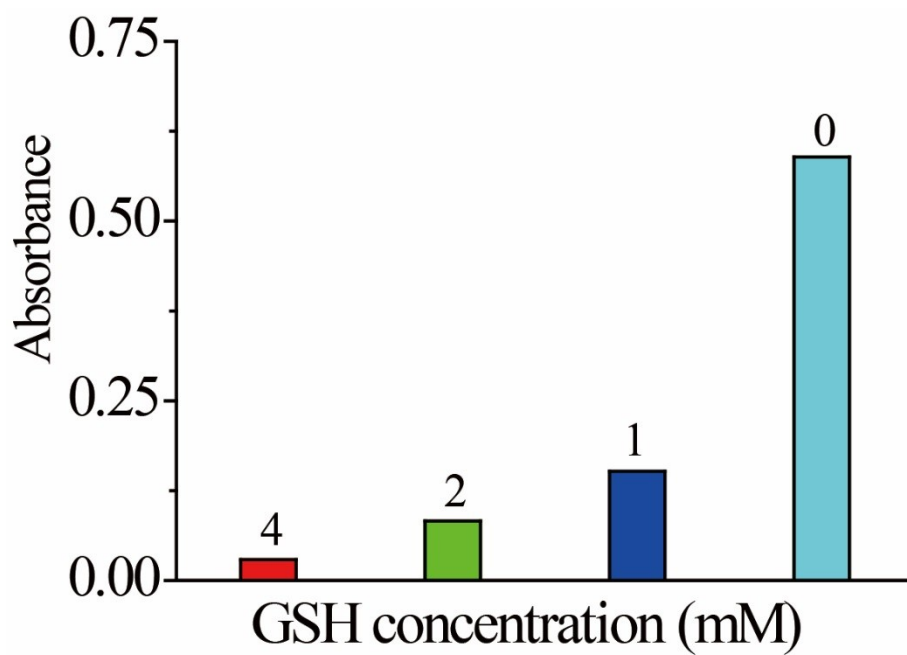

**Figure S7.** Effect of glutathione (GSH) concentration on oxidation of dopamine under white LED illumination.



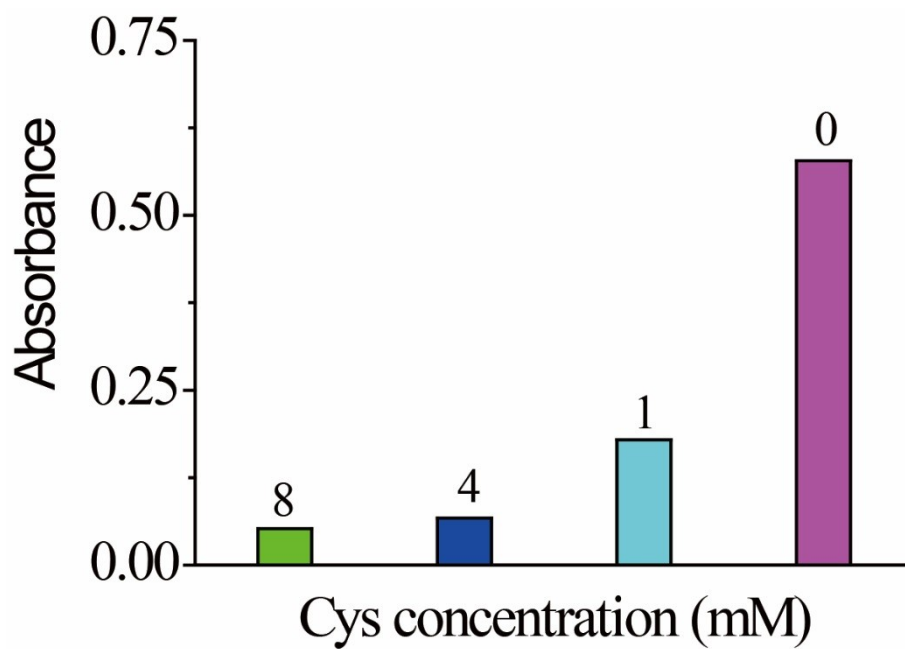

**Figure S8.** Effect of cysteine (Cys) concentration on oxidation of dopamine under white LED illumination.
